# Supplementary material for: Oxygen vacancy induced electron traps in tungsten doped Bi2MoO6 for enhanced photocatalytic performance
Source: Royal Society of Chemistry journal article supplement (doi:10.1039/d1ce00868d), 2021-01-01
Supplement: d1ce00868d1.pdf [file d1ce00868d1.pdf]

## Oxygen Vacancies induced electron traps in Tungsten doped $\text{Bi}_2\text{MoO}_6$ for Enhanced Photocatalytic Performance

Chang Sun,<sup>ab</sup> Zitong Zhao,<sup>ab</sup> Hougang Fan,<sup>\*abc</sup> Yanli Chen,<sup>abc</sup> Xiaoyan Liu,<sup>abc</sup> Jian Cao,<sup>abc</sup> Jihui Lang,<sup>abc</sup>  
Maobin Wei,<sup>abc</sup> Huilian Liu<sup>abc</sup> Lili Yang<sup>\*abc</sup>

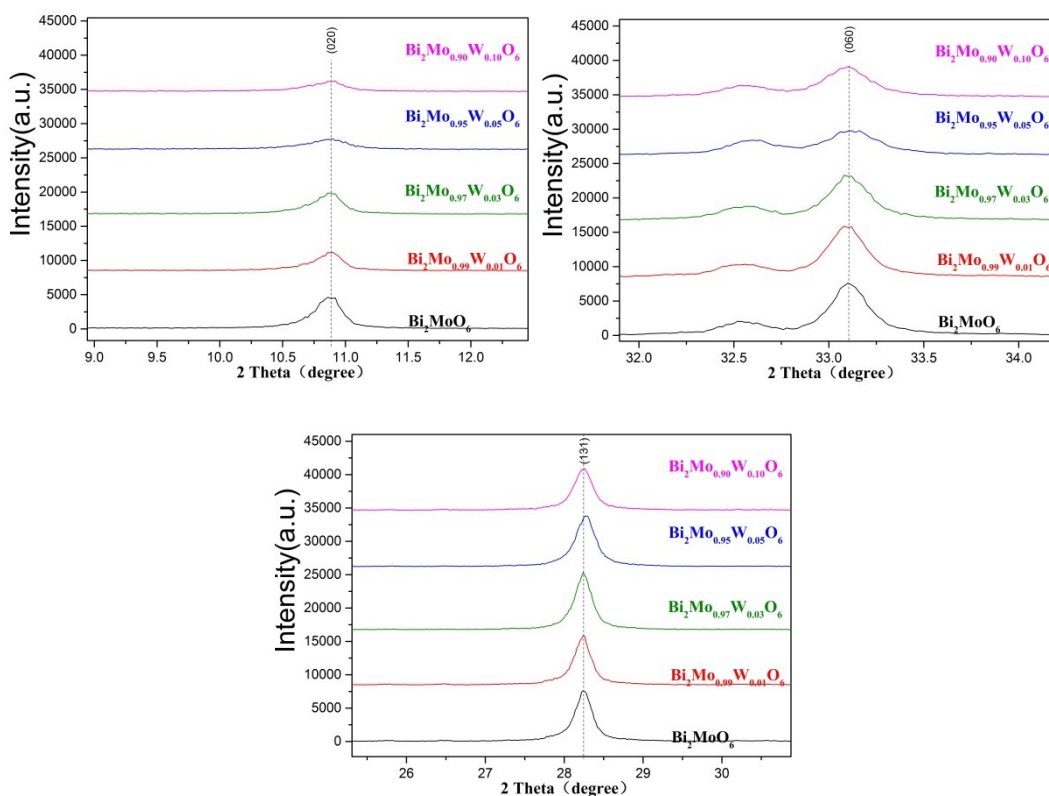

Fig. S1 The enlarged XRD patterns of (131), (060) and (020) peaks for the  $\text{Bi}_2\text{Mo}_{1-x}\text{W}_x\text{O}_6$  samples

Table S1. The lattice constant of the  $\text{Bi}_2\text{Mo}_{1-x}\text{W}_x\text{O}_6$  samples.

|                                                        | a(Å)  | b(Å)   | c(Å)  | Vol<br>(Å <sup>3</sup> ) |
|--------------------------------------------------------|-------|--------|-------|--------------------------|
| $\text{Bi}_2\text{MoO}_6$                              | 5.499 | 16.215 | 5.491 | 489.61                   |
| $\text{Bi}_2\text{Mo}_{0.99}\text{W}_{0.01}\text{O}_6$ | 5.500 | 16.218 | 5.492 | 489.91                   |
| $\text{Bi}_2\text{Mo}_{0.97}\text{W}_{0.03}\text{O}_6$ | 5.501 | 16.222 | 5.488 | 489.71                   |
| $\text{Bi}_2\text{Mo}_{0.95}\text{W}_{0.05}\text{O}_6$ | 5.499 | 16.217 | 5.490 | 489.56                   |
| $\text{Bi}_2\text{Mo}_{0.90}\text{W}_{0.10}\text{O}_6$ | 5.500 | 16.222 | 5.490 | 489.89                   |

Table S2 The grain size (nm) of the  $\text{Bi}_2\text{Mo}_{1-x}\text{W}_x\text{O}_6$  samples.

|            | $x=0.00$      | $x=0.01$      | $x=0.03$      | $x=0.05$      | $x=0.10$      |
|------------|---------------|---------------|---------------|---------------|---------------|
| Grain size | $29.0\pm 1.7$ | $29.2\pm 1.9$ | $27.5\pm 2.2$ | $20.6\pm 4.8$ | $24.2\pm 3.2$ |

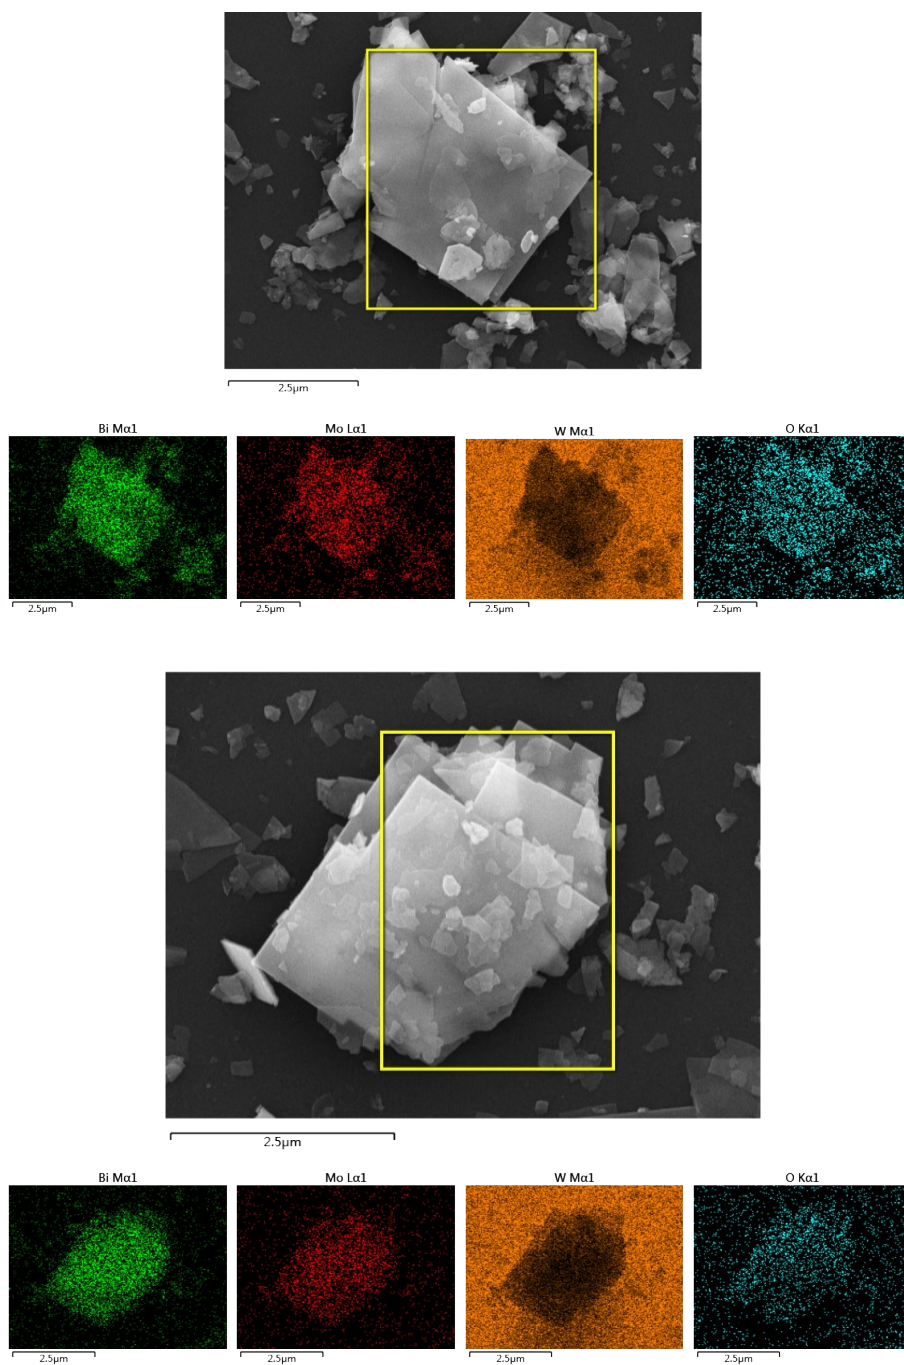

Fig. S2 Element mapping of  $\text{Bi}_2\text{Mo}_{0.95}\text{W}_{0.05}\text{O}_6$  sample

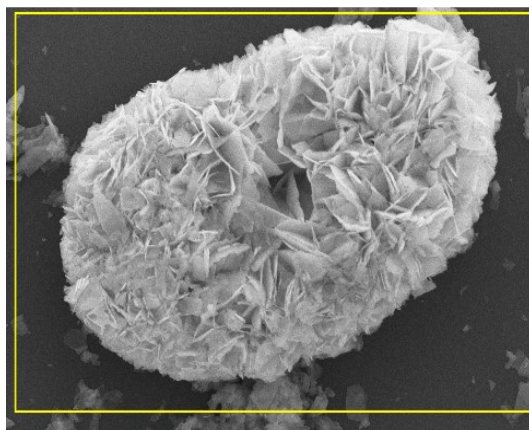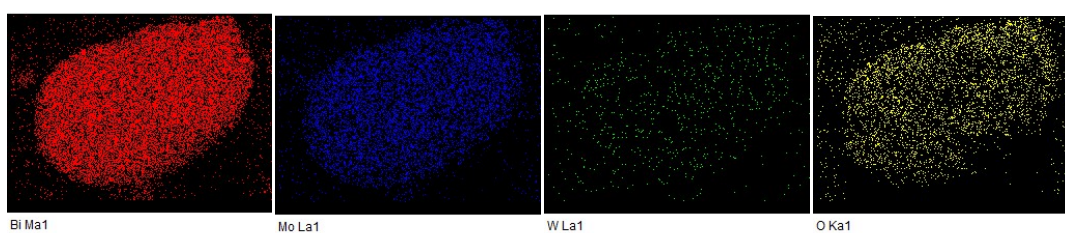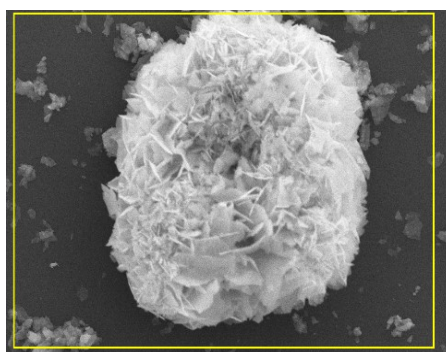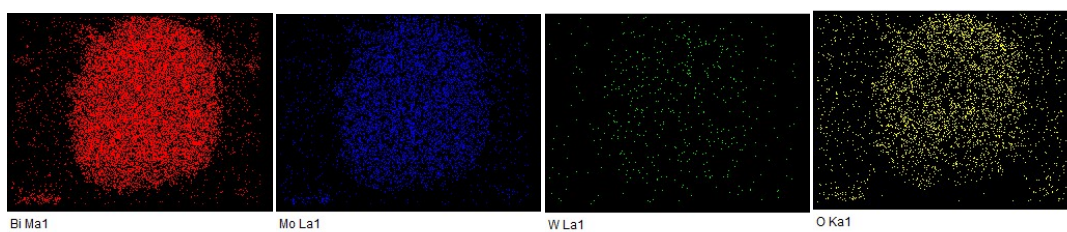

Fig S3. Element Mapping of Bi<sub>2</sub>Mo<sub>0.90</sub>W<sub>0.10</sub>O<sub>6</sub> sample

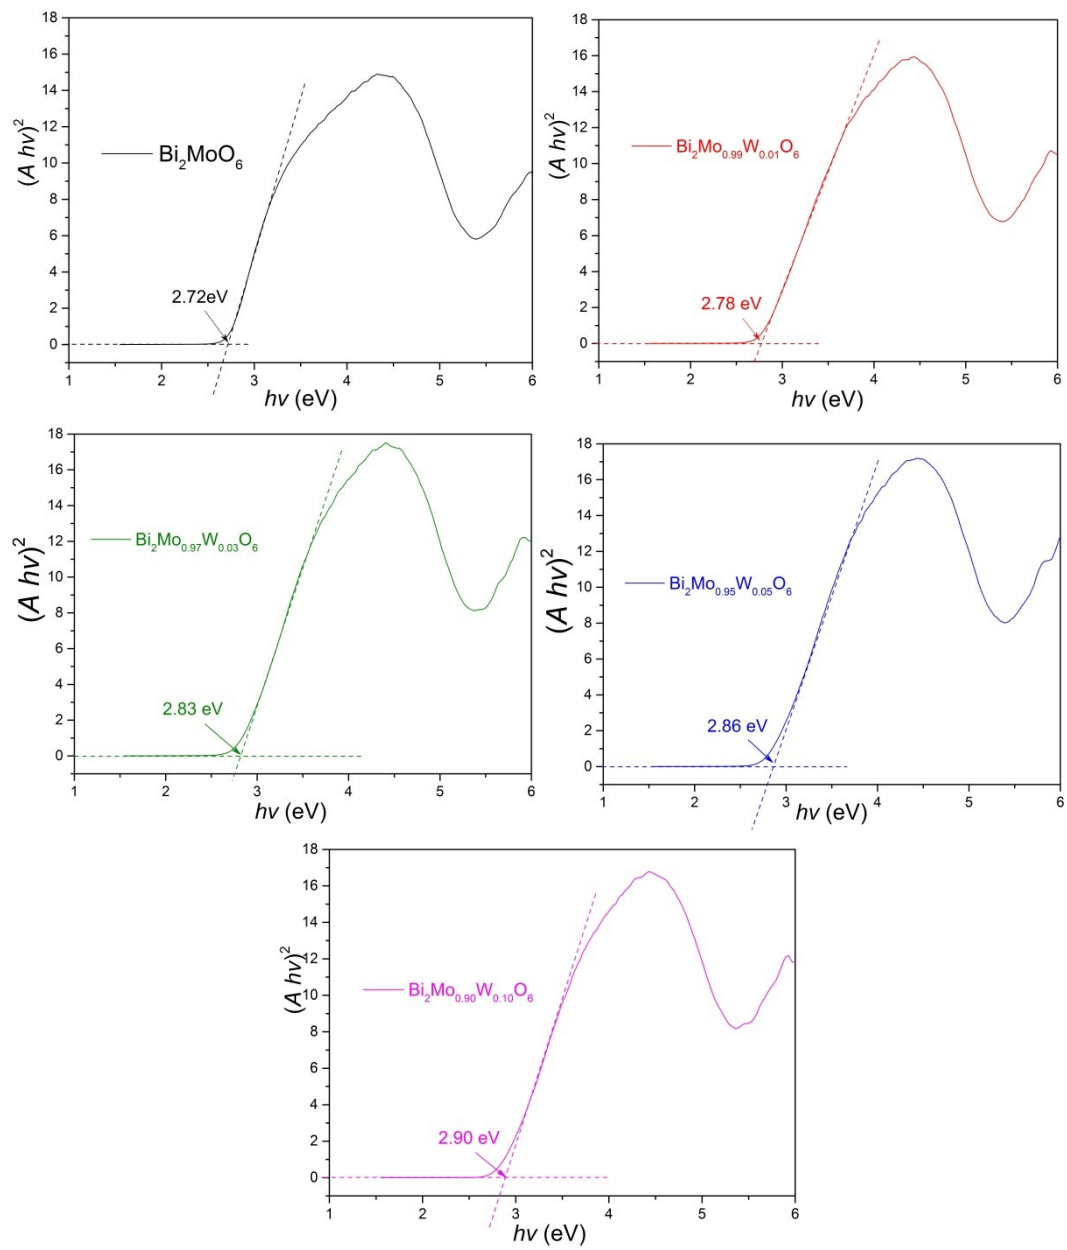

Fig. S4 The band gap of  $\text{Bi}_2\text{Mo}_{(1-x)}\text{W}_x\text{O}_6$  samples through Tauc plot.

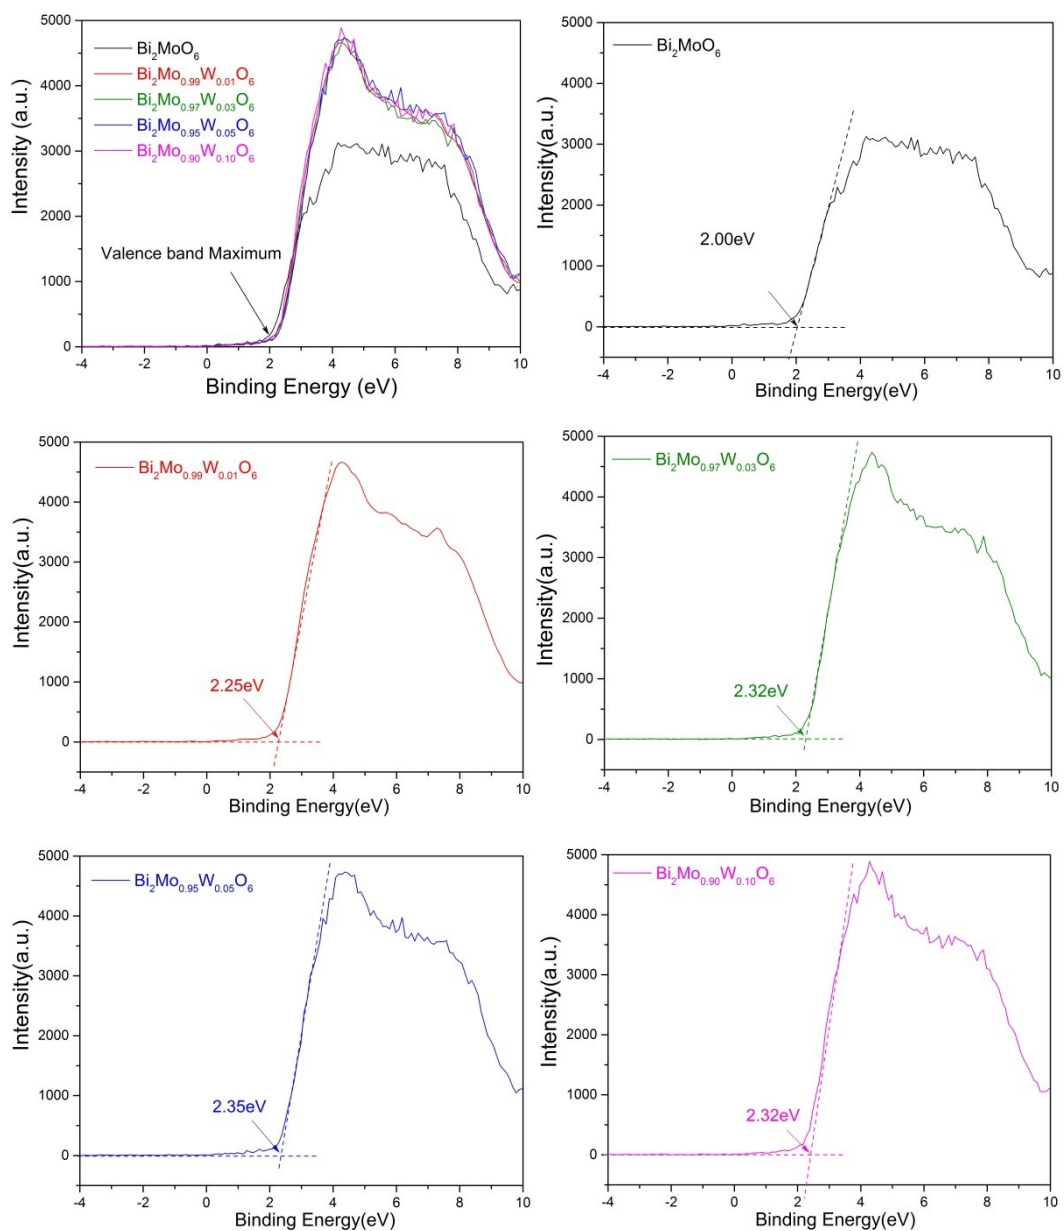

Fig. S5 The valence band maximum of  $\text{Bi}_2\text{Mo}_{(1-x)}\text{W}_x\text{O}_6$  samples.



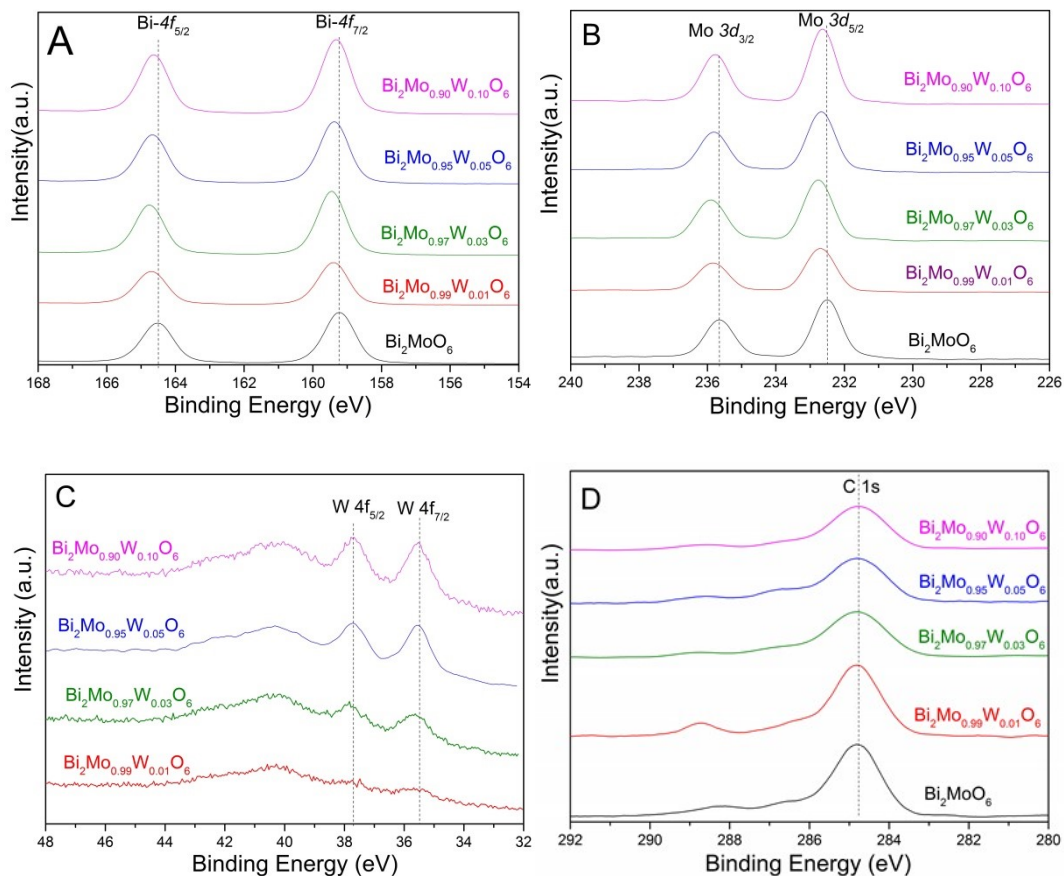

Fig. S6 The high resolution XPS scans over (A)Bi 4f, (B)Mo 3d, (C)W 4f and (D)C 1s peaks of  $\text{Bi}_2\text{Mo}_{1-x}\text{W}_x\text{O}_6$  samples.

Table S3 The atomic percentages of every element in the  $\text{Bi}_2\text{Mo}_{(1-x)}\text{W}_x\text{O}_6$  samples

| Atomic %                                               | Bi 4f | Mo 3d | W 4f | O 1s  |
|--------------------------------------------------------|-------|-------|------|-------|
| $\text{Bi}_2\text{MoO}_6$                              | 18.95 | 9.93  | /    | 71.12 |
| $\text{Bi}_2\text{Mo}_{0.99}\text{W}_{0.01}\text{O}_6$ | 20.29 | 9.71  | 0.14 | 69.85 |
| $\text{Bi}_2\text{Mo}_{0.97}\text{W}_{0.03}\text{O}_6$ | 22.13 | 10.05 | 0.31 | 67.51 |
| $\text{Bi}_2\text{Mo}_{0.95}\text{W}_{0.05}\text{O}_6$ | 21.07 | 9.41  | 0.52 | 69.00 |
| $\text{Bi}_2\text{Mo}_{0.90}\text{W}_{0.10}\text{O}_6$ | 21.59 | 9.66  | 0.54 | 68.21 |

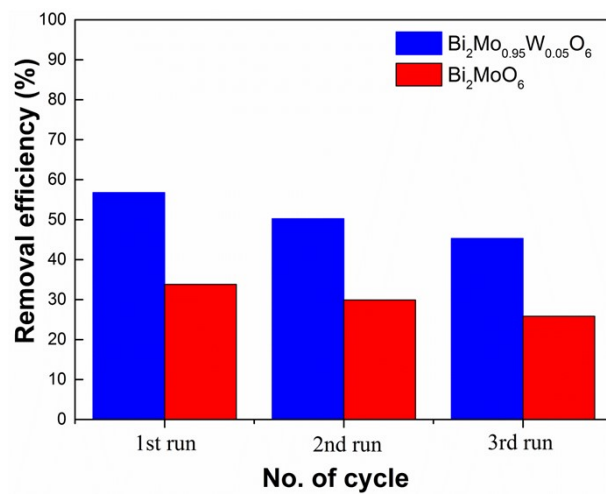

Fig. S7 The reusability of the  $\text{Bi}_2\text{MoO}_6$  and  $\text{Bi}_2\text{Mo}_{0.95}\text{W}_{0.05}\text{O}_6$  samples for RhB removal.
